# Supplementary material for: Design, luminescence properties and applications of Cr3+-doped ScTaO4: a broadband near-infrared phosphor
Source: Royal Society of Chemistry journal article supplement (doi:10.1039/d2dt02671f), 2022-01-01
Supplement: d2dt02671f6.pdf [file d2dt02671f6.pdf]

# Design, Luminescent properties and Application of Cr<sup>3+</sup> doped ScTaO<sub>4</sub>: a broadband near-infrared phosphor

Shan Wang<sup>a,b</sup>, Su Zhang<sup>b\*</sup>, Shuang Liu<sup>a,b</sup>, Songlin Han<sup>c</sup>, Xiaodong Li<sup>a\*</sup>, Chaowei Wang<sup>b,c</sup>,  
Chengyu Li<sup>b</sup>

<sup>a</sup> School of materials science and engineering, Jilin Architecture University, Jilin, 130118.

<sup>b</sup> State Key Laboratory of Application of Rare Earth Resources, Changchun Institute of Applied  
Chemistry, Chinese Academy of Sciences, Jilin, 130022

<sup>c</sup> Zhongke rare earth changchun Co., Ltd, Changchun, Jilin, 130012

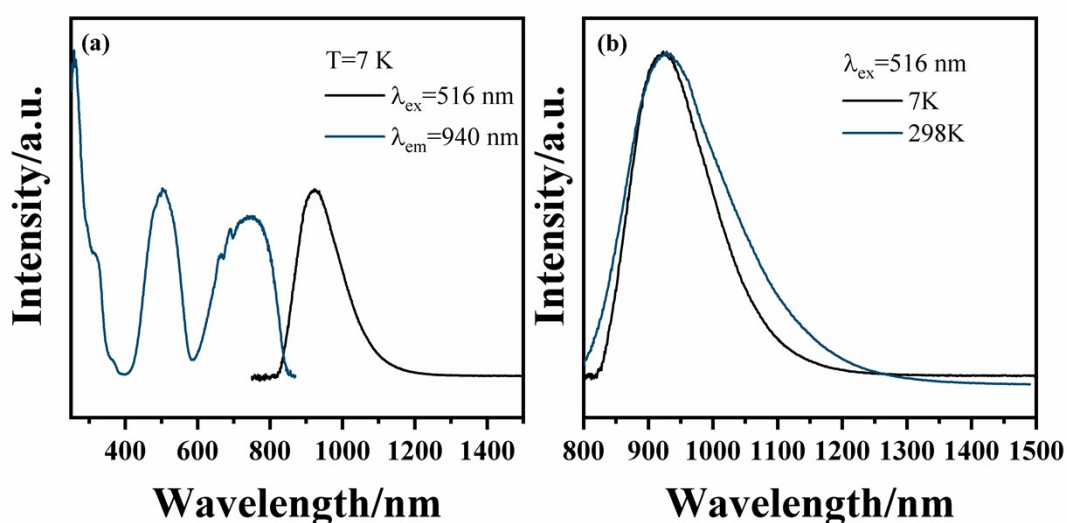

Fig. S1. (a) The excitation and emission spectrum of ScTaO<sub>4</sub>:0.02Cr<sup>3+</sup> at 7 K (b) Normalized emission spectrum at 298 K and at 7 K

We measured the lifetime at 7 K. The decay curve can be well fitted with the single-order exponential decay model, expressed by the following equation:

$$I = I_0 + A \exp(-t/\tau)$$

here  $I_0$  represents the initial emission intensity,  $A$  is a constant, and  $\tau$  is the lifetime. The single-exponential decay model indicates that the Cr<sup>3+</sup> ions only occupy one type of lattice site in ScTaO<sub>4</sub>:0.02Cr<sup>3+</sup>.

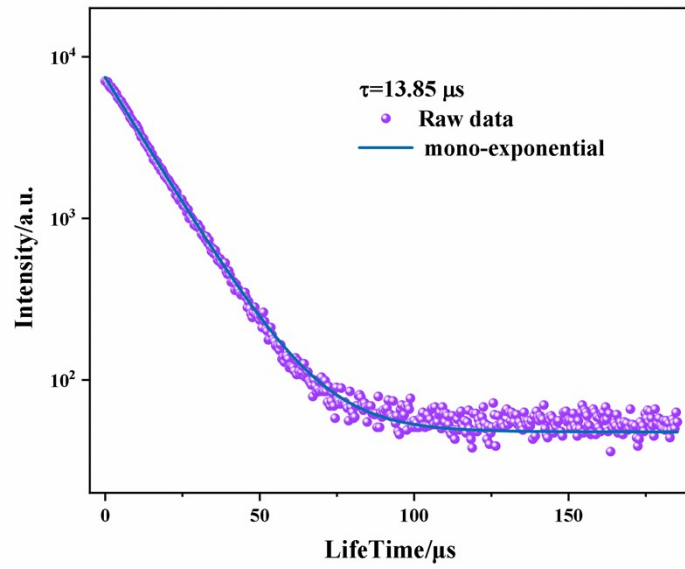

Fig. S2. The PL decay curves of the  $\text{ScTaO}_4:0.02\text{Cr}^{3+}$  at 7 K ( $\lambda_{\text{ex}}=516$  nm)

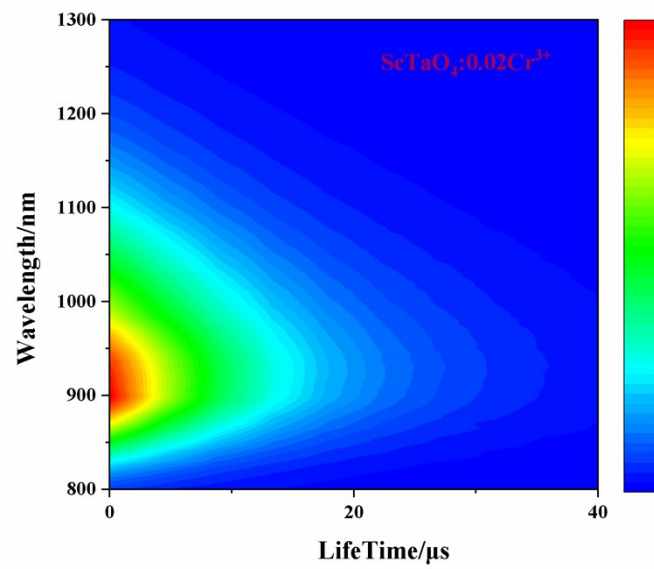

Fig. S3. Time resolved spectroscopy of the  $\text{ScTaO}_4:0.02\text{Cr}^{3+}$  sample excited at 516 nm
