# Supplementary figures and images for: Design, luminescence properties and applications of Cr3+-doped ScTaO4: a broadband near-infrared phosphor
Source: Royal Society of Chemistry journal article supplement (doi:10.1039/d2dt02671f), 2022-01-01

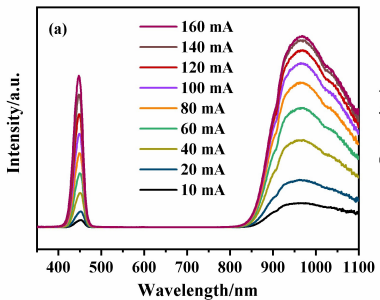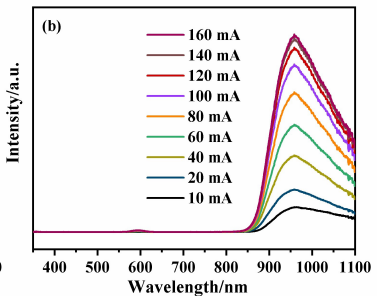

Supplement: d2dt02671f2.pdf [file d2dt02671f2.pdf]

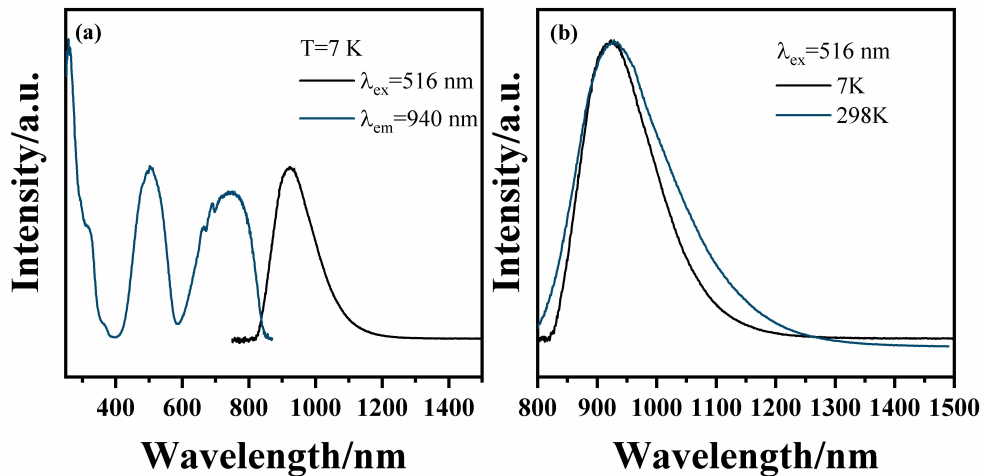

Supplement: d2dt02671f3.pdf [file d2dt02671f3.pdf]

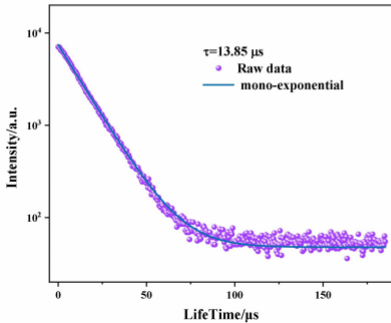

Supplement: d2dt02671f4.pdf [file d2dt02671f4.pdf]

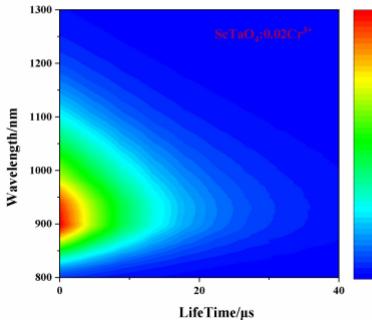

Supplement: d2dt02671f5.pdf [file d2dt02671f5.pdf]
